# Supplementary material
Source: publisher figshare collection journal article supplement (https://rs.figshare.com/ndownloader/files/14603129)
Supplement: Supplementary file 1 [file 14603129]

## Sheet: Paper details
Variability in the durability of CRISPR-Cas immunity
Hélène Chabas1, Antoine Nicot1, Sean Meaden2, Edze Westra2, Denise Tremblay3,4, Léa Pradier1, Sébastien Lion1, Sylvain Moineau3,4 and Sylvain Gandon1
1CEFE UMR 5175, CNRS – Université de Montpellier – Université Paul-Valéry Montpellier – EPHE, 1919, route de Mende, 34293 Montpellier Cedex 5, France
2Environment and Sustainability Institute, University of Exeter, Penryn Campus, Penryn, Cornwall, TR10 9FE, UK
3Département de biochimie, microbiologie et de bio-informatique, Faculté des sciences et de génie, Université Laval, 1045 avenue de la Médecine, Québec City, QC, Canada, G1V 0A6
4Félix d’Hérelle Reference Center for Bacterial Viruses and Groupe de recherche en écologie buccale, Faculté de médecine dentaire, Université Laval, Québec City, QC, Canada, G1V 0A6

## Sheet: Durability
BIM	Mutants	Replicate	Position on phage genome
ORF_17	26	Replicate 2	10270
ORF_38_B	27	Replicate 2	31132
ORF_27	65	Replicate 2	25544
ORF_2	47	Replicate 2	1199
NC	7	Replicate 2	954
ORF_9	33	Replicate 2	7020
ORF_33	10	Replicate 2	27003
ORF_44	42	Replicate 2	34587
ORF_38_A	20	Replicate 2	31055
ORF_38_C	2	Replicate 2	31709
ORF_20	77	Replicate 2	21022
ORF_24	8	Replicate 2	24326
ORF_5	88	Replicate 2	3223
ORF_37_A	84	Replicate 2	29988
ORF_21	7	Replicate 2	23067
ORF_19	94	Replicate 2	16226
ORF_37_B	69	Replicate 2	30369
ORF_9	6	Replicate 1	7020
ORF_27	37	Replicate 1	25544
ORF_37_A	45	Replicate 1	29988
ORF_33	2	Replicate 1	27003
ORF_5	83	Replicate 1	3223
ORF_24	4	Replicate 1	24326
ORF_44	14	Replicate 1	34587
ORF_38_B	28	Replicate 1	31132
ORF_37_B	32	Replicate 1	30369
NC	10	Replicate 1	954
ORF_20	41	Replicate 1	21022
ORF_2	17	Replicate 1	1199
ORF_38_C	4	Replicate 1	31709
ORF_21	9	Replicate 1	23067
ORF_38_A	17	Replicate 1	31055
ORF_17	14	Replicate 1	10270
ORF_19	83	Replicate 1	16226
ORF_17	44	Replicate 3	10270
ORF_38_B	50	Replicate 3	31132
ORF_27	70	Replicate 3	25544
ORF_2	32	Replicate 3	1199
NC	13	Replicate 3	954
ORF_9	40	Replicate 3	7020
ORF_33	17	Replicate 3	27003
ORF_44	58	Replicate 3	34587
ORF_38_A	33	Replicate 3	31055
ORF_38_C	0	Replicate 3	31709
ORF_20	81	Replicate 3	21022
ORF_24	16	Replicate 3	24326
ORF_5	91	Replicate 3	3223
ORF_37_A	84	Replicate 3	29988
ORF_21	18	Replicate 3	23067
ORF_19	83	Replicate 3	16226
ORF_37_B	80	Replicate 3	30369

## Sheet: Fitness
Name (Escape Phage + replicate)	Escape Phage	BIM	T0	T1	Fitness	Mutation	P_E (Probability of Escape)
ORF_17_d1	ORF_17_d	ORF_17	0.848	0.8122	-3.76692874884557	N	0.29166667
ORF_17_d2	ORF_17_d	ORF_17	0.848	0.8086	-3.79035891913578	N	0.29166667
ORF_17_d3	ORF_17_d	ORF_17	0.848	0.7678	-4.03536758402069	N	0.29166667
NC_d1	NC_d	NC	0.3825	0.6441	-2.44014306610573	NA	0.10416667
NC_d2	NC_d	NC	0.3825	0.7175	-2.10125287009515	NA	0.10416667
NC_d3	NC_d	NC	0.3825	0.7955	-1.67494439484745	NA	0.10416667
ORF_38_C_c1	ORF_38_C_c	ORF_38_C	0.054	0.0898	-2.96511854016476	S	0.02083333
ORF_38_C_c2	ORF_38_C_c	ORF_38_C	0.054	0.1675	-2.25248903047985	S	0.02083333
ORF_38_C_c3	ORF_38_C_c	ORF_38_C	0.054	0.1038	-2.80473679151063	S	0.02083333
ORF_19_b1	ORF_19_b	ORF_19	0.8475	0.7071	-4.34608308080861	N	0.90277778
ORF_19_b2	ORF_19_b	ORF_19	0.8475	0.7212	-4.27700211314232	N	0.90277778
ORF_19_b3	ORF_19_b	ORF_19	0.8475	0.7006	-4.37726728680726	N	0.90277778
ORF_37_B_a1	ORF_37_B_a	ORF_37_B	0.9632	0.7977	-5.40508006901426	S	0.62847222
ORF_37_B_a2	ORF_37_B_a	ORF_37_B	0.9632	0.7655	-5.59398728454624	S	0.62847222
ORF_37_B_a3	ORF_37_B_a	ORF_37_B	0.9632	0.8705	-4.87167403368899	S	0.62847222
ORF_27_a1	ORF_27_a	ORF_27	0.0553	0.6845	0.100326788616061	NA	0.59722222
ORF_27_a2	ORF_27_a	ORF_27	0.0553	0.597	-0.281222622685256	NA	0.59722222
ORF_27_a3	ORF_27_a	ORF_27	0.0553	0.6395	-0.101008509837281	NA	0.59722222
NC_a1	NC_a	NC	0.0265	0.5976	0.486930424475182	NA	0.10416667
NC_a2	NC_a	NC	0.0265	0.7002	0.939705832294172	NA	0.10416667
NC_a3	NC_a	NC	0.0265	0.6334	0.638286208141038	NA	0.10416667
ORF_21_a1	ORF_21_a	ORF_21	0.4761	0.2728	-4.39708738905824	N	0.11805556
ORF_21_a2	ORF_21_a	ORF_21	0.4761	0.3504	-4.03390620194951	N	0.11805556
ORF_21_a3	ORF_21_a	ORF_21	0.4761	0.365	-3.97035241747447	N	0.11805556
ORF_37_B_c1	ORF_37_B_c	ORF_37_B	0.1855	0.4268	-2.32769731290978	S	0.62847222
ORF_37_B_c2	ORF_37_B_c	ORF_37_B	0.1855	0.4326	-2.30402914523916	S	0.62847222
ORF_37_B_c3	ORF_37_B_c	ORF_37_B	0.1855	0.3942	-2.46246964025788	S	0.62847222
ORF_37_B_d1	ORF_37_B_d	ORF_37_B	0.3794	0.6809	-2.26229106865989	N	0.62847222
ORF_37_B_d2	ORF_37_B_d	ORF_37_B	0.3794	0.7744	-1.78687697152614	N	0.62847222
ORF_37_B_d3	ORF_37_B_d	ORF_37_B	0.3794	0.7773	-1.77020118589176	N	0.62847222
WT1	WT	_DGCC	0.0516	0.5092	-0.564238846827746	NA	NA
WT2	WT	_DGCC	0.0516	0.6829	0.166088253748501	NA	NA
WT3	WT	_DGCC	0.0516	0.7309	0.398150593079245	NA	NA
ORF_33_c1	ORF_33_c	ORF_33	0.5155	0.8935	-1.44731620505417	S	0.10069444
ORF_33_c2	ORF_33_c	ORF_33	0.5155	0.884	-1.54345068297289	S	0.10069444
ORF_33_c3	ORF_33_c	ORF_33	0.5155	0.99	1.02080229563042	S	0.10069444
ORF_38_C_a1	ORF_38_C_a	ORF_38_C	0.387	0.491	-3.08836132822755	N	0.02083333
ORF_38_C_a2	ORF_38_C_a	ORF_38_C	0.387	0.4281	-3.34196477724192	N	0.02083333
ORF_38_C_a3	ORF_38_C_a	ORF_38_C	0.387	0.496	-3.06835778081799	N	0.02083333
ORF_5_a1	ORF_5_a	ORF_5	0.1697	0.0537	-4.79368941534954	N	0.90972222
ORF_5_a2	ORF_5_a	ORF_5	0.1697	0.0364	-5.20065026944819	N	0.90972222
ORF_5_a3	ORF_5_a	ORF_5	0.1697	0.0432	-5.02229666129647	N	0.90972222
ORF_21_d1	ORF_21_d	ORF_21	0.052	0.1487	-2.35402063812828	N	0.11805556
ORF_21_d2	ORF_21_d	ORF_21	0.052	0.1602	-2.26592763232021	N	0.11805556
ORF_21_d3	ORF_21_d	ORF_21	0.052	0.1219	-2.5837463445831	N	0.11805556
ORF_9_b1	ORF_9_b	ORF_9	0.4095	0.8861	-1.09475600943356	N	0.27430556
ORF_9_b2	ORF_9_b	ORF_9	0.4095	0.8946	-1.0076508951422	N	0.27430556
ORF_9_b3	ORF_9_b	ORF_9	0.4095	0.8889	-1.06671090343164	N	0.27430556
ORF_33_b1	ORF_33_b	ORF_33	0.3274	0.8335	-1.18169115523849	N	0.10069444
ORF_33_b2	ORF_33_b	ORF_33	0.3274	0.8393	-1.13930060966352	N	0.10069444
ORF_33_b3	ORF_33_b	ORF_33	0.3274	0.9788	1.03999660188171	N	0.10069444
ORF_38_A_a1	ORF_38_A_a	ORF_38_A	0.301	0.1686	-4.26533918614382	S	0.24305556
ORF_38_A_a2	ORF_38_A_a	ORF_38_A	0.301	0.1561	-4.35729438153557	S	0.24305556
ORF_38_A_a3	ORF_38_A_a	ORF_38_A	0.301	0.1451	-4.44331854803509	S	0.24305556
ORF_38_A_b1	ORF_38_A_b	ORF_38_A	0.1227	0.6023	-1.13013331712447	N	0.24305556
ORF_38_A_b2	ORF_38_A_b	ORF_38_A	0.1227	0.6176	-1.06581720742718	N	0.24305556
ORF_38_A_b3	ORF_38_A_b	ORF_38_A	0.1227	0.4523	-1.73657304026638	N	0.24305556
ORF_24_c1	ORF_24_c	ORF_24	0.0171	0.0298	-2.94386260261376	NA	0.09722222
ORF_24_c2	ORF_24_c	ORF_24	0.0171	0.025	-3.12443040644365	NA	0.09722222
ORF_24_c3	ORF_24_c	ORF_24	0.0171	0.0243	-3.15354757208141	NA	0.09722222
ORF_38_B_a1	ORF_38_B_a	ORF_38_B	0.0893	0.7233	-0.2291954486243	N	0.36458333
ORF_38_B_a2	ORF_38_B_a	ORF_38_B	0.0893	0.9285	1.37378729540614	N	0.36458333
ORF_38_B_a3	ORF_38_B_a	ORF_38_B	0.0893	0.7844	0.101408619600694	N	0.36458333
ORF_38_B_c1	ORF_38_B_c	ORF_38_B	0.5566	0.3791	-4.23304225013611	N	0.36458333
ORF_38_B_c2	ORF_38_B_c	ORF_38_B	0.5566	0.4093	-4.10653212510239	N	0.36458333
ORF_38_B_c3	ORF_38_B_c	ORF_38_B	0.5566	0.3167	-4.50865128252969	N	0.36458333
ORF_38_C_b1	ORF_38_C_b	ORF_38_C	0.384	0.0403	-6.20996253810313	N	0.02083333
ORF_38_C_b2	ORF_38_C_b	ORF_38_C	0.384	0.0423	-6.15944076190752	N	0.02083333
ORF_38_C_b3	ORF_38_C_b	ORF_38_C	0.384	0.0381	-6.2683894844581	N	0.02083333
ORF_38_C_e1	ORF_38_C_e	ORF_38_C	0.1772	0.8061	-0.551998320729203	N	0.02083333
ORF_38_C_e2	ORF_38_C_e	ORF_38_C	0.1772	0.7802	-0.710031307667117	N	0.02083333
ORF_38_C_e3	ORF_38_C_e	ORF_38_C	0.1772	0.9303	0.614443234237882	N	0.02083333
ORF_21_c1	ORF_21_c	ORF_21	0.8541	0.694	-4.46053765124691	N	0.11805556
ORF_21_c2	ORF_21_c	ORF_21	0.8541	0.6762	-4.54306166077108	N	0.11805556
ORF_21_c3	ORF_21_c	ORF_21	0.8541	0.7292	-4.28885700803495	N	0.11805556
ORF_17_b1	ORF_17_b	ORF_17	0.3255	0.5013	-2.77848845666141	S	0.29166667
ORF_17_b2	ORF_17_b	ORF_17	0.3255	0.4179	-3.11508855320261	S	0.29166667
ORF_17_b3	ORF_17_b	ORF_17	0.3255	0.4102	-3.14682711912168	S	0.29166667
ORF_2_a1	ORF_2_a	ORF_2	0.1465	0.1913	-3.19156271225617	N	0.33333333
ORF_2_a2	ORF_2_a	ORF_2	0.1465	0.1945	-3.17100860815913	N	0.33333333
ORF_2_a3	ORF_2_a	ORF_2	0.1465	0.2413	-2.89554303831364	N	0.33333333
ORF_33_a1	ORF_33_a	ORF_33	0.1862	0.3316	-2.73836178511345	S	0.10069444
ORF_33_a2	ORF_33_a	ORF_33	0.1862	0.3167	-2.80638345989549	S	0.10069444
ORF_33_a3	ORF_33_a	ORF_33	0.1862	0.2689	-3.0376150976778	S	0.10069444
ORF_44_b1	ORF_44_b	ORF_44	0.0654	0.6838	-0.0814107581449726	N	0.39583333
ORF_44_b2	ORF_44_b	ORF_44	0.0654	0.7757	0.388080095395861	N	0.39583333
ORF_44_b3	ORF_44_b	ORF_44	0.0654	0.7307	0.145475668404818	N	0.39583333
ORF_27_d1	ORF_27_d	ORF_27	0.1181	0.7063	-0.624269496476854	NA	0.59722222
ORF_27_d2	ORF_27_d	ORF_27	0.1181	0.6389	-0.93115771536227	NA	0.59722222
ORF_27_d3	ORF_27_d	ORF_27	0.1181	0.5951	-1.11666139907447	NA	0.59722222
ORF_2_c1	ORF_2_c	ORF_2	0.0787	0.595	-0.667480783247355	N	0.33333333
ORF_2_c2	ORF_2_c	ORF_2	0.0787	0.5802	-0.728560657385675	N	0.33333333
ORF_2_c3	ORF_2_c	ORF_2	0.0787	0.546	-0.867633343982888	N	0.33333333
NC_c1	NC_c	NC	0.1447	0.4479	-1.94466722750542	NA	0.10416667
NC_c2	NC_c	NC	0.1447	0.382	-2.21657588027979	NA	0.10416667
NC_c3	NC_c	NC	0.1447	0.375	-2.24633365519467	NA	0.10416667
ORF_9_a1	ORF_9_a	ORF_9	0.2376	0.738	-1.3108155966871	N	0.27430556
ORF_9_a2	ORF_9_a	ORF_9	0.2376	0.7216	-1.39400287723832	N	0.27430556
ORF_9_a3	ORF_9_a	ORF_9	0.2376	0.8387	-0.697827828667269	N	0.27430556
ORF_38_A_e1	ORF_38_A_e	ORF_38_A	0.168	0.5806	-1.58719228783731	S	0.24305556
ORF_38_A_e2	ORF_38_A_e	ORF_38_A	0.168	0.6534	-1.27841109907456	S	0.24305556
ORF_38_A_e3	ORF_38_A_e	ORF_38_A	0.168	0.4557	-2.09009508813034	S	0.24305556
NC_e1	NC_e	NC	0.3885	0.5643	-2.80004380520675	NA	0.10416667
NC_e2	NC_e	NC	0.3885	0.619	-2.57336999950055	NA	0.10416667
NC_e3	NC_e	NC	0.3885	0.6593	-2.39849955560612	NA	0.10416667
ORF_20_b1	ORF_20_b	ORF_20	0.6083	0.7082	-3.06581171944373	N	0.69097222
ORF_20_b2	ORF_20_b	ORF_20	0.6083	0.798	-2.57862872298424	N	0.69097222
ORF_20_b3	ORF_20_b	ORF_20	0.6083	0.6723	-3.23386350926263	N	0.69097222
ORF_37_A_a1	ORF_37_A_a	ORF_37_A	0.178	0.6566	-1.33416178100976	S	0.73958333
ORF_37_A_a2	ORF_37_A_a	ORF_37_A	0.178	0.7176	-1.04975303248838	S	0.73958333
ORF_37_A_a3	ORF_37_A_a	ORF_37_A	0.178	0.8637	-0.135973690030126	S	0.73958333
ORF_19_a1	ORF_19_a	ORF_19	0.4383	0.7082	-2.37757548667523	N	0.90277778
ORF_19_a2	ORF_19_a	ORF_19	0.4383	0.604	-2.84207340358402	N	0.90277778
ORF_19_a3	ORF_19_a	ORF_19	0.4383	0.7705	-2.05309676500478	N	0.90277778
ORF_37_B_b1	ORF_37_B_b	ORF_37_B	0.0691	0.7277	0.0712839226441728	N	0.62847222
ORF_37_B_b2	ORF_37_B_b	ORF_37_B	0.0691	0.8449	0.783447653947152	N	0.62847222
ORF_37_B_b3	ORF_37_B_b	ORF_37_B	0.0691	0.8073	0.520860217951495	N	0.62847222
ORF_17_a1	ORF_17_a	ORF_17	0.2797	0.7245	-1.5994533575228	N	0.29166667
ORF_17_a2	ORF_17_a	ORF_17	0.2797	0.774	-1.33531061637313	N	0.29166667
ORF_17_a3	ORF_17_a	ORF_17	0.2797	0.7527	-1.45328292317746	N	0.29166667
ORF_2_b1	ORF_2_b	ORF_2	0.1649	0.5959	-1.50167493811584	S	0.33333333
ORF_2_b2	ORF_2_b	ORF_2	0.1649	0.5795	-1.56936425041754	S	0.33333333
ORF_2_b3	ORF_2_b	ORF_2	0.1649	0.5597	-1.65014082064874	S	0.33333333
